# Supplementary material
Source: MDPI journal article supplement (https://www.mdpi.com/2571-6255/6/10/397)
Supplement: s1 [file s1]

**Supplementary material**

for

# **Estimating the Trade-Offs between Wildfires and Carbon Stocks across Landscape Types to Inform Nature-Based Solutions in Mediterranean Regions**

**Rui Serôdio Simões, Paulo Flores Ribeiro and José Lima Santos**

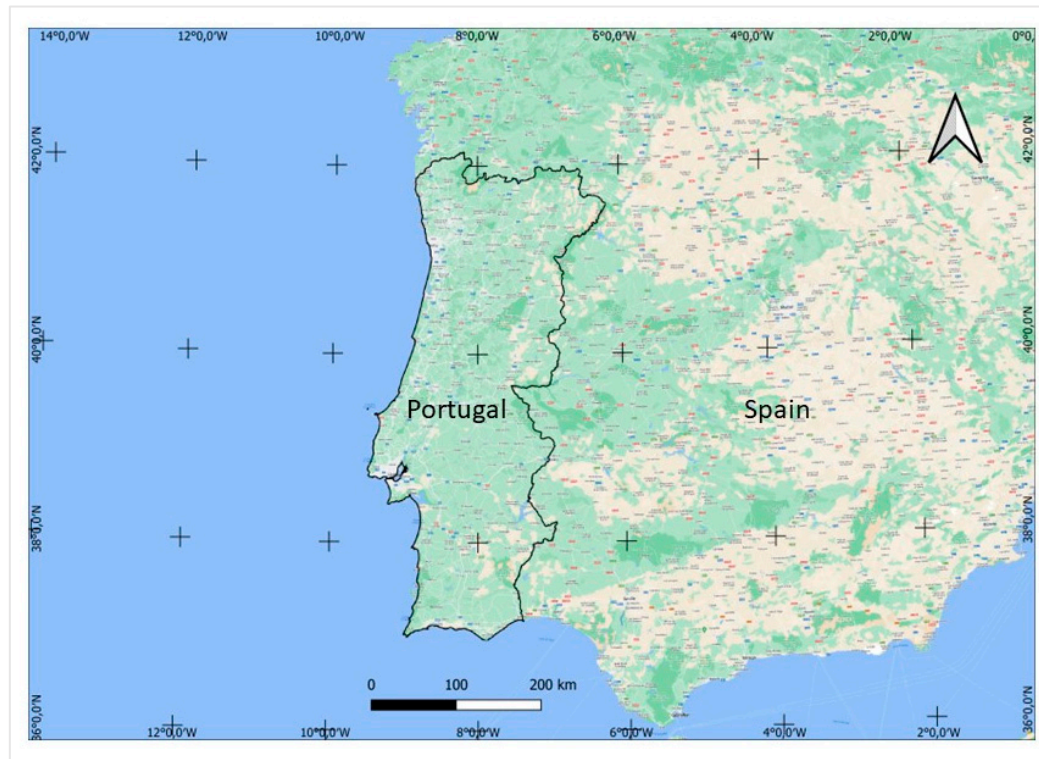

**Figure S1.** Mainland Portugal. Limit source: Portuguese General-Directorate of Territory. Background source: Google Maps -Alternative rendering (<https://mt1.google.com/vt/lyrs=r&x={x}&y={y}&z={z}>, accessed on August 21<sup>th</sup> 2023)

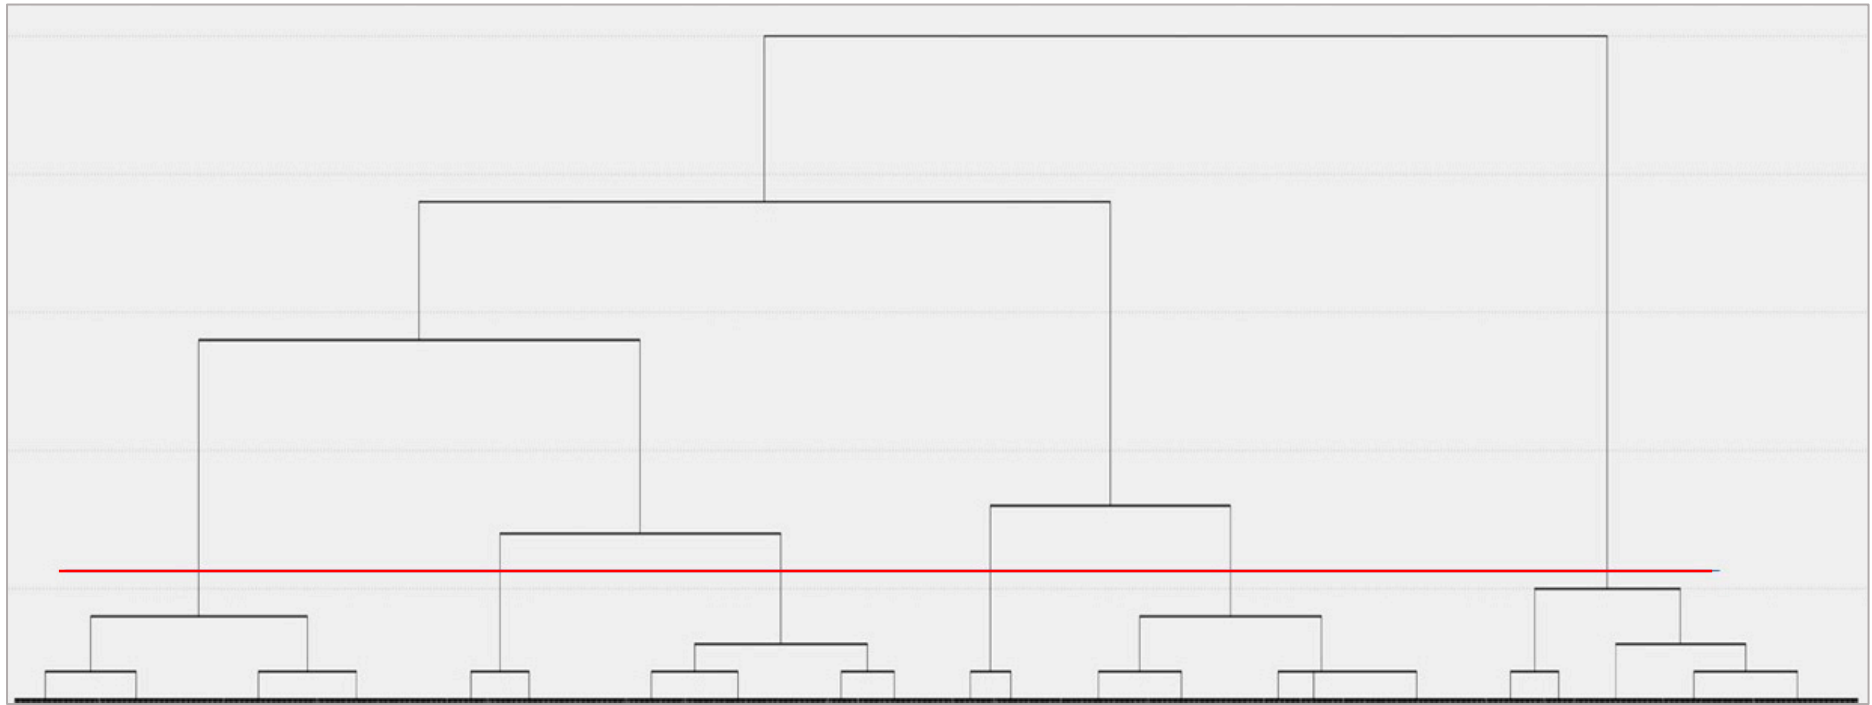

**Figure S2.** Dendrogram of hierarchical cluster analysis (Ward method) performed on the land use/land cover variables. Vertical distance measures Euclidean distance. Horizontal axe refers to the 2595 analysis units (hexagons) considered. Red line marks the cut-off point, done at 6 clusters separation

**Table S1**-Results of multiple logistic regression analysis for the most hazardous fire and LULC model. A significant relation between FR3 and LULC after conversion from forest plantations was found (chi squared =778.083;  $p < 0.001$ ) with a percentage of correct predictions of FR3 occurring (or not) of 87%, and a Nagelkerke's- $R^2$  of about 40%. Farmland proportion-FAR%; Agroforestry proportion-AGF%; Native Forest proportion FOR%; Shrub proportion SHR%

| Variable    | Beta  | p     |
|-------------|-------|-------|
| (Intercept) | 1.54  | 0.000 |
| FAR %       | -0.07 | 0.000 |
| AGF %       | -0.06 | 0.000 |
| FOR %       | -0.04 | 0.000 |
| SHR %       | -0.01 | 0.000 |

**Table S2** - Results of multiple linear regression analysis (dependent variable: CS) with simultaneous entry showed increasing forest plantations conversion always implied a reduction in CS depending the rate of such decrease on the LULCs they were converted on. Farmland proportion-FAR%; Agroforestry proportion-AGF%; Native Forest proportion FOR%; Shrub proportion SHR%

| Variable    | Beta  | p     |
|-------------|-------|-------|
| (Intercept) | 26.09 | 0.000 |
| FAR %       | -0.22 | 0.000 |
| AGF %       | -0.11 | 0.000 |
| FOR %       | -0.02 | 0.000 |
| SHR %       | -0.15 | 0.000 |

Note: [F (4,2761) =1251,644 ;p<0,001;R²=0,645]
